# Supplementary material
Source: Springer Nature journal article supplement (https://www.springermedizin.de/resource/supplementary/12943_2013_1223_MOESM4_ESM.pdf/9552382)

**A**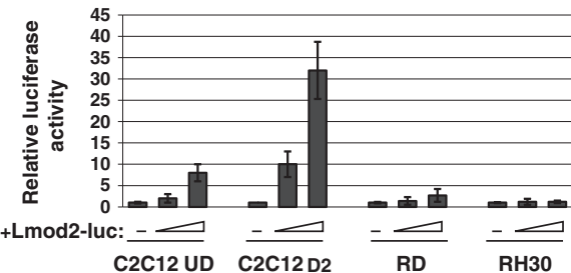**B**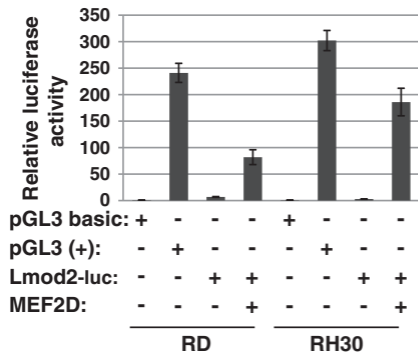

Supplement: MOESM4 [file 9552382]
